# Supplementary material
Source: publisher figshare collection journal article supplement (https://tandf.figshare.com/ndownloader/files/17820374)
Supplement: Supplementary file 1 [file 17820374]

## Appendix 1.

| Quantitative information section                                                                                                                                                                                                                          |  |                                   |                                    |
|-----------------------------------------------------------------------------------------------------------------------------------------------------------------------------------------------------------------------------------------------------------|--|-----------------------------------|------------------------------------|
| <b>Domain 1: health concerns (12 items)</b><br>Before/after the lifestyle intervention, I was concerned about:<br><i>Choices:</i><br>1. This is not an issue for me<br>2. Not concerned<br>3. Indifferent<br>4. Somewhat concerned<br>5. Very concerned   |  |                                   |                                    |
| Domain item                                                                                                                                                                                                                                               |  | Pre-intervention scores* (n = 55) | Post-intervention scores* (n = 55) |
| 1. Fertility and my ability to become pregnant in the future                                                                                                                                                                                              |  | 4.1 ± 1.3                         | 4.2 ± 1.1                          |
| 2. Irregular menstrual bleeding                                                                                                                                                                                                                           |  | 4.2 ± 0.8                         | 3.8 ± 1.1                          |
| 3. Unwanted male pattern hair growth (hirsutism)                                                                                                                                                                                                          |  | 4.1 ± 1.1                         | 4.2 ± 0.8                          |
| 4. High male hormone levels (hyperandrogenemia)                                                                                                                                                                                                           |  | 3.9 ± 1.1                         | 4.3 ± 0.8                          |
| 5. Acne                                                                                                                                                                                                                                                   |  | 3.4 ± 1.4                         | 4.0 ± 1.2                          |
| 6. Scalp hair loss (alopecia)                                                                                                                                                                                                                             |  | 3.3 ± 1.5                         | 3.7 ± 1.3                          |
| 7. A weight problem                                                                                                                                                                                                                                       |  | 4.6 ± 0.9                         | 4.6 ± 0.8                          |
| 8. High insulin levels and insulin resistance                                                                                                                                                                                                             |  | 4.1 ± 1.2                         | 4.5 ± 0.8                          |
| 9. My risk of developing cancer of the uterus or breast                                                                                                                                                                                                   |  | 4.4 ± 1.0                         | 4.4 ± 0.7                          |
| 10. My risk of developing diabetes                                                                                                                                                                                                                        |  | 4.6 ± 0.8                         | 4.6 ± 0.6                          |
| 11. My risk of developing cardiovascular disease                                                                                                                                                                                                          |  | 4.3 ± 0.9                         | 4.4 ± 0.6                          |
| 12. My risk of developing the metabolic syndrome (a group of symptoms, including elevated levels of blood triglyceride, glucose, waist circumference, blood pressure, and decreased high-density lipoprotein cholesterol levels)                          |  | 4.4 ± 0.9                         | 4.7 ± 0.6                          |
| <b>Domain 2: healthcare satisfaction (5 items)</b><br>Before/after the lifestyle intervention:<br><i>Choices:</i><br>1. I did not see a healthcare provider<br>2. Don't know<br>3. No<br>4. Yes somewhat<br>5. Yes to a large extent                      |  |                                   |                                    |
| Domain item                                                                                                                                                                                                                                               |  | Pre-intervention scores* (n = 55) | Post-intervention scores* (n = 55) |
| 13. I had discussed my symptoms with my primary healthcare providers                                                                                                                                                                                      |  | 4.2 ± 1.0                         | 4.7 ± 0.6                          |
| 14. I felt satisfied with the explanation given to me about my symptoms by my healthcare providers                                                                                                                                                        |  | 4.0 ± 1.0                         | 4.6 ± 0.7                          |
| 15. I felt satisfied with the treatment options offered to me by my healthcare providers                                                                                                                                                                  |  | 3.4 ± 1.0                         | 4.3 ± 0.9                          |
| 16. I felt satisfied with the treatment I was receiving (or had received) for my symptoms by my healthcare providers                                                                                                                                      |  | 3.3 ± 1.0                         | 4.3 ± 0.9                          |
| 17. I felt satisfied with the on-going care I was receiving for my symptoms by my healthcare providers                                                                                                                                                    |  | 3.3 ± 1.0                         | 4.3 ± 0.8                          |
| <b>Domain 3: knowledge about PCOS (23 items)</b><br>Before/after the lifestyle intervention I understood [that]:<br><i>Choices:</i><br>1. I do not understand this information<br>2. I am unsure<br>3. Yes, I somewhat understand<br>4. Yes, I understand |  |                                   |                                    |

| Domain item                                                                                                                                                                                                                                                                                                                                                                                                                                                                                                                                                                                                                                                                                                                                                                                                                                                                                                                                                                                                                                                                                                                                                                                                                                                                                                                                                                                                                                                                                                                                                                                                                                                                                                                                                                                                                                                                                                                                                                                                                                                                                                                                                                                                                                                                                                                                                                                                                        | Pre-intervention scores* (n = 55)                                                                                                                                                                                                                                                                       | Post-intervention scores* (n = 55)                                                                                                                                                                                                                                                                    |
|------------------------------------------------------------------------------------------------------------------------------------------------------------------------------------------------------------------------------------------------------------------------------------------------------------------------------------------------------------------------------------------------------------------------------------------------------------------------------------------------------------------------------------------------------------------------------------------------------------------------------------------------------------------------------------------------------------------------------------------------------------------------------------------------------------------------------------------------------------------------------------------------------------------------------------------------------------------------------------------------------------------------------------------------------------------------------------------------------------------------------------------------------------------------------------------------------------------------------------------------------------------------------------------------------------------------------------------------------------------------------------------------------------------------------------------------------------------------------------------------------------------------------------------------------------------------------------------------------------------------------------------------------------------------------------------------------------------------------------------------------------------------------------------------------------------------------------------------------------------------------------------------------------------------------------------------------------------------------------------------------------------------------------------------------------------------------------------------------------------------------------------------------------------------------------------------------------------------------------------------------------------------------------------------------------------------------------------------------------------------------------------------------------------------------------|---------------------------------------------------------------------------------------------------------------------------------------------------------------------------------------------------------------------------------------------------------------------------------------------------------|-------------------------------------------------------------------------------------------------------------------------------------------------------------------------------------------------------------------------------------------------------------------------------------------------------|
| 18. A follicle is a small fluid-filled sac with a single egg inside and that follicles are often called cysts<br>19. How follicle growth and egg release occur<br>20. Polycystic ovaries contain more visible follicles than the average ovary<br>21. Polycystic ovaries tend to ovulate less frequently than the average ovary<br>22. Ovulating more frequently would improve my fertility<br>23. After egg release (ovulation), progesterone is released: progesterone would allow my uterine lining to shed and make me have a regular menstrual period (if I'm not pregnant)<br>24. Having monthly increases in progesterone and therefore, menstrual periods would decrease my risk of cancer of the uterus<br>25. Polycystic ovary tends to make more male hormones (like testosterone) than the average ovary<br>26. The amount of fat in the body affects the amount of free male hormone in my body<br>27. More free male hormone promotes unwanted hair growth, acne and scalp hair loss (alopecia)<br>28. Medications can stop the production of male hormone by the ovary (like hormonal contraception) or block the effects of the male hormone, and would help to prevent unwanted hair growth, acne or alopecia (male pattern balding)<br>29. Insulin helps the ovary make more male hormones (like testosterone)<br>30. High insulin levels are common in women with PCOS<br>31. High insulin levels promote weight gain and make it harder to lose weight<br>32. High insulin levels place individuals at high risk for developing diabetes<br>33. Lowering insulin levels may help to decrease male hormone levels, help with weight loss and help trigger ovulation<br>34. Insulin levels can be reduced by exercise and by certain changes in diet<br>35. Insulin levels can be lowered by medications (like metformin) that make the body more sensitive to insulin<br>36. Increasing the amount of muscle in my body will increase my body's metabolic rate, that is my body's ability to burn calories<br>37. The metabolic syndrome increases my risk of developing diabetes and cardiovascular disease.<br>38. The metabolic syndrome is common in women with PCOS<br>39. That exercise, appropriate changes in diet, and weight loss can decrease the risk of developing the metabolic syndrome<br>40. Enough about PCOS to explain to another person what PCOS is, and how it affects health parameters | 3.5 ± 0.7<br>3.0 ± 0.8<br>3.5 ± 0.7<br>3.5 ± 0.7<br>3.7 ± 0.7<br>3.3 ± 0.8<br>3.1 ± 0.9<br>3.3 ± 0.9<br>2.8 ± 0.9<br>3.1 ± 0.9<br>3.0 ± 0.9<br>2.9 ± 0.9<br>3.3 ± 0.9<br>3.4 ± 0.8<br>3.5 ± 0.8<br>3.3 ± 0.8<br>3.5 ± 0.8<br>3.3 ± 0.8<br>3.5 ± 0.7<br>3.2 ± 0.9<br>3.2 ± 0.9<br>3.4 ± 0.9<br>3.1 ± 0.7 | 3.8 ± 0<br>3.7 ± 0.4<br>3.9 ± 0.5<br>3.9 ± 0.2<br>3.9 ± 0.3<br>3.9 ± 0.3<br>3.8 ± 0.6<br>4.0 ± 0.2<br>3.7 ± 0.5<br>3.9 ± 0.4<br>3.7 ± 0.6<br>3.7 ± 0.5<br>3.9 ± 0.2<br>4.0 ± 0.2<br>4.0 ± 0.2<br>3.9 ± 0.3<br>4.0 ± 0.2<br>3.8 ± 0.5<br>3.9 ± 0.4<br>3.9 ± 0.3<br>3.9 ± 0.4<br>4.0 ± 0.2<br>3.7 ± 0.6 |
| <b>Domain 4: healthy lifestyle behaviors including active living and healthy eating (14 items)</b>                                                                                                                                                                                                                                                                                                                                                                                                                                                                                                                                                                                                                                                                                                                                                                                                                                                                                                                                                                                                                                                                                                                                                                                                                                                                                                                                                                                                                                                                                                                                                                                                                                                                                                                                                                                                                                                                                                                                                                                                                                                                                                                                                                                                                                                                                                                                 |                                                                                                                                                                                                                                                                                                         |                                                                                                                                                                                                                                                                                                       |
| Before/after the lifestyle intervention:                                                                                                                                                                                                                                                                                                                                                                                                                                                                                                                                                                                                                                                                                                                                                                                                                                                                                                                                                                                                                                                                                                                                                                                                                                                                                                                                                                                                                                                                                                                                                                                                                                                                                                                                                                                                                                                                                                                                                                                                                                                                                                                                                                                                                                                                                                                                                                                           |                                                                                                                                                                                                                                                                                                         |                                                                                                                                                                                                                                                                                                       |
| <b>Sub-domain of active living (6 items)</b>                                                                                                                                                                                                                                                                                                                                                                                                                                                                                                                                                                                                                                                                                                                                                                                                                                                                                                                                                                                                                                                                                                                                                                                                                                                                                                                                                                                                                                                                                                                                                                                                                                                                                                                                                                                                                                                                                                                                                                                                                                                                                                                                                                                                                                                                                                                                                                                       |                                                                                                                                                                                                                                                                                                         |                                                                                                                                                                                                                                                                                                       |
| Sub-domain item                                                                                                                                                                                                                                                                                                                                                                                                                                                                                                                                                                                                                                                                                                                                                                                                                                                                                                                                                                                                                                                                                                                                                                                                                                                                                                                                                                                                                                                                                                                                                                                                                                                                                                                                                                                                                                                                                                                                                                                                                                                                                                                                                                                                                                                                                                                                                                                                                    | Pre-intervention scores* (n = 55)                                                                                                                                                                                                                                                                       | Post-intervention scores* (n = 55)                                                                                                                                                                                                                                                                    |
| 41. I led an active lifestyle<br><i>Choices:</i><br>1. Strongly disagree<br>2. Disagree<br>3. Neutral<br>4. Agree<br>5. Strongly agree<br>42. Total number of times I exercised per week<br><i>Choices:</i><br>1. No, I didn't really exercise<br>2. 1 to 2 days each week<br>3. 3 to 4 days each week<br>4. 5 to 6 days each week<br>5. Daily<br>43. The number of days per week of doing aerobic exercise (that is, an exercise that increases heart rate and makes you warm and sweaty) was                                                                                                                                                                                                                                                                                                                                                                                                                                                                                                                                                                                                                                                                                                                                                                                                                                                                                                                                                                                                                                                                                                                                                                                                                                                                                                                                                                                                                                                                                                                                                                                                                                                                                                                                                                                                                                                                                                                                     | 3.0 ± 1.2<br><br>2.2 ± 1.2<br><br>2.4 ± 1.4                                                                                                                                                                                                                                                             | 4.1 ± 1.0<br><br>3.2 ± 1.1<br><br>3.7 ± 1.2                                                                                                                                                                                                                                                           |

|                                                                                                                                                                                                                                                                                                                                                                                                                                                                                                                                                                                                                                                                                                                                                                                                                                                                                                                                                                                 |                                                                                                                                         |                                                                                                                                         |
|---------------------------------------------------------------------------------------------------------------------------------------------------------------------------------------------------------------------------------------------------------------------------------------------------------------------------------------------------------------------------------------------------------------------------------------------------------------------------------------------------------------------------------------------------------------------------------------------------------------------------------------------------------------------------------------------------------------------------------------------------------------------------------------------------------------------------------------------------------------------------------------------------------------------------------------------------------------------------------|-----------------------------------------------------------------------------------------------------------------------------------------|-----------------------------------------------------------------------------------------------------------------------------------------|
| <p><i>Choices:</i><br/> 1. Occasional<br/> 2. 1-2 times per week<br/> 3. 3-4 times per week<br/> 4. 5-6 times per week<br/> 5. Daily</p> <p>44. The number of minutes per session of doing aerobic exercise was (examples of non-aerobic exercise include resistance bands, hand weights, Pilates or Yoga but not activities such as jogging or walking)<br/> <i>Choices:</i><br/> 1. 2-5 minutes<br/> 2. 6-10 minutes<br/> 3. 11-15 minutes<br/> 4. 16-30 minutes<br/> 5. 31-44 minutes<br/> 6. greater than 45 minutes</p> <p>45. The number of days per week of non-aerobic exercise was<br/> <i>Choices:</i><br/> 1. Occasional<br/> 2. 1-2 times per week<br/> 3. 3-4 times per week<br/> 4. 5-6 times per week<br/> 5. Daily</p> <p>46. The number of minutes per session of non-aerobic exercise was<br/> <i>Choices:</i><br/> 1. 2-5 minutes<br/> 2. 6-10 minutes<br/> 3. 11-15 minutes<br/> 4. 16-30 minutes<br/> 5. 31-44 minutes<br/> 6. Greater than 45 minutes</p> | <p>3.1 ± 2.0</p> <p>2.1 ± 1.1</p> <p>2.7 ± 0.2</p>                                                                                      | <p>5.0 ± 1.2</p> <p>2.7 ± 1.2</p> <p>3.7 ± 1.5</p>                                                                                      |
| <b>Sub-domain of healthy eating (8 items)</b>                                                                                                                                                                                                                                                                                                                                                                                                                                                                                                                                                                                                                                                                                                                                                                                                                                                                                                                                   |                                                                                                                                         |                                                                                                                                         |
| <b>Sub-domain item</b>                                                                                                                                                                                                                                                                                                                                                                                                                                                                                                                                                                                                                                                                                                                                                                                                                                                                                                                                                          |                                                                                                                                         |                                                                                                                                         |
| <p>Before/after the lifestyle intervention:<br/> <i>Choices:</i><br/> 1. Never<br/> 2. Hardly ever<br/> 3. Sometimes<br/> 4. Almost always<br/> 5. Always</p>                                                                                                                                                                                                                                                                                                                                                                                                                                                                                                                                                                                                                                                                                                                                                                                                                   |                                                                                                                                         |                                                                                                                                         |
| <b>Domain item</b>                                                                                                                                                                                                                                                                                                                                                                                                                                                                                                                                                                                                                                                                                                                                                                                                                                                                                                                                                              | <b>Pre-intervention scores* (n = 55)</b>                                                                                                | <b>Post-intervention scores* (n = 55)</b>                                                                                               |
| <p>47. I thought about the types of food I was eating when planning every meal</p> <p>48. I ate three meals per day</p> <p>49. I ate protein with every meal</p> <p>50. I ate a diet low in fat</p> <p>51. I made healthy food choices for snacks</p> <p>52. I ate a diet rich in fruits and vegetables</p> <p>53. I knew which foods were high in protein</p> <p>54. I knew the difference between simple and complex carbohydrate-containing foods</p>                                                                                                                                                                                                                                                                                                                                                                                                                                                                                                                        | <p>3.0 ± 0.8</p> <p>3.5 ± 1.2</p> <p>3.5 ± 0.9</p> <p>2.8 ± 0.8</p> <p>3.0 ± 0.7</p> <p>3.3 ± 0.8</p> <p>3.6 ± 1.0</p> <p>1.6 ± 1.2</p> | <p>4.0 ± 0.8</p> <p>4.0 ± 0.9</p> <p>3.9 ± 0.8</p> <p>3.8 ± 0.8</p> <p>3.9 ± 0.9</p> <p>4.2 ± 0.7</p> <p>4.3 ± 0.9</p> <p>4.2 ± 1.2</p> |

**Domain 5: feelings and experiences about participating in lifestyle intervention (13 items)**

Before/after participating in the study, I felt:

Choices:

1. Strongly disagree
2. Disagree
3. Neutral
4. Agree
5. Strongly agree

|                                                                                                                                                                               |           |            |
|-------------------------------------------------------------------------------------------------------------------------------------------------------------------------------|-----------|------------|
| 55. Comfortable about asking questions [from the study researchers]                                                                                                           | 4.4 ± 0.6 | 4.7 ± 0.5  |
| 56. Comfortable about discussing personal or sensitive subjects [with the study researchers]                                                                                  | 4.2 ± 0.7 | 4.5 ± 0.7  |
| 57. My information would remain confidential (unless I agreed to have my information sent to my family doctor)                                                                | 4.5 ± 0.6 | 4.7 ± 0.5  |
| 58. The [study] researchers were knowledgeable about PCOS                                                                                                                     | 4.7 ± 0.6 | 4.7 ± 0.6  |
| 59. The [study] researchers would gain helpful information about PCOS                                                                                                         | 4.6 ± 0.6 | 4.6 ± 0.6  |
| 60. The [study] researchers would be able to provide answers regarding my concerns about PCOS                                                                                 | 4.6 ± 0.6 | 4.76 ± 0.5 |
| 61. It was helpful to look at the ultrasound images of my ovaries. Now it is now easier for me to understand what it means to have polycystic ovaries                         | 4.4 ± 0.8 | 4.67 ± 0.5 |
| Before/after participating in the study, my level of comfort with:                                                                                                            | 4.1 ± 0.2 | 4.2 ± 0.9  |
| 62. The idea of having blood tests was                                                                                                                                        |           |            |
| Choices:                                                                                                                                                                      |           |            |
| 1. Painful                                                                                                                                                                    |           |            |
| 2. Very uncomfortable                                                                                                                                                         |           |            |
| 3. Uncomfortable                                                                                                                                                              |           |            |
| 4. Slightly uncomfortable                                                                                                                                                     |           |            |
| 5. Comfortable                                                                                                                                                                |           |            |
| 6. Very comfortable                                                                                                                                                           | 3.1 ± 0.2 | 4.0 ± 0.8  |
| 63. The idea of having physical examinations, including having my height, weight, and waist circumference measured, hair growth assessed, and body composition scans done was |           |            |
| Choices:                                                                                                                                                                      |           |            |
| 1. Painful                                                                                                                                                                    |           |            |
| 2. Very uncomfortable                                                                                                                                                         |           |            |
| 3. Uncomfortable                                                                                                                                                              |           |            |
| 4. Slightly uncomfortable                                                                                                                                                     |           |            |
| 5. Comfortable                                                                                                                                                                |           |            |
| 6. Very comfortable                                                                                                                                                           | 2.7 ± 1.2 | 2.9 ± 1.1  |
| 64. The idea of having a transvaginal ultrasound was                                                                                                                          |           |            |
| Choices:                                                                                                                                                                      |           |            |
| 1. Uncomfortable                                                                                                                                                              |           |            |
| 2. Slightly uncomfortable                                                                                                                                                     |           |            |
| 3. Neutral                                                                                                                                                                    |           |            |
| 4. Comfortable                                                                                                                                                                | 3.5 ± 1.2 | 3.6 ± 1.4  |
| 5. Very comfortable                                                                                                                                                           |           |            |
| 65. The experience of doing blood tests was                                                                                                                                   |           |            |
| Choices:                                                                                                                                                                      |           |            |
| 1. Too painful                                                                                                                                                                |           |            |
| 2. Painful and I wanted to quit but didn't say so                                                                                                                             |           |            |
| 3. Painful but I didn't want to quit                                                                                                                                          |           |            |
| 4. Not overly painful                                                                                                                                                         |           |            |
| 5. Not at all painful/no discomfort                                                                                                                                           | 3.6 ± 1.1 | 4.4 ± 0.6  |
| 66. The experience of doing physical examination tests was                                                                                                                    |           |            |

|                                                                                                                                                                                                                                                                                                                                                                                                                                                                                                                                                                                                                                                                                                                                                                                                                                                                                                                                                                                                                                                                                                                                                                      |                                          |                                           |
|----------------------------------------------------------------------------------------------------------------------------------------------------------------------------------------------------------------------------------------------------------------------------------------------------------------------------------------------------------------------------------------------------------------------------------------------------------------------------------------------------------------------------------------------------------------------------------------------------------------------------------------------------------------------------------------------------------------------------------------------------------------------------------------------------------------------------------------------------------------------------------------------------------------------------------------------------------------------------------------------------------------------------------------------------------------------------------------------------------------------------------------------------------------------|------------------------------------------|-------------------------------------------|
| <p>Choices:</p> <ol style="list-style-type: none"> <li>1. Painful</li> <li>2. Very uncomfortable</li> <li>3. Uncomfortable</li> <li>4. Slightly uncomfortable</li> <li>5. Comfortable</li> <li>6. Very comfortable</li> </ol> <p>67. The experience of doing transvaginal ultrasound was</p> <p>Choices:</p> <ol style="list-style-type: none"> <li>1. Too painful</li> <li>2. Painful and I wanted to quit but didn't say so</li> <li>3. Painful but I didn't want to quit</li> <li>4. Not overly painful</li> <li>5. Not at all painful/no discomfort</li> </ol>                                                                                                                                                                                                                                                                                                                                                                                                                                                                                                                                                                                                   | 3.9 ± 0.7                                | 4.1 ± 0.8                                 |
| <p><b>Domain 6: feelings and experiences about PCOS diagnosis (7 items)</b></p> <p>Choose the response that best describes your feelings:</p> <ol style="list-style-type: none"> <li>1. Don't know</li> <li>2. No</li> <li>3. Yes</li> </ol>                                                                                                                                                                                                                                                                                                                                                                                                                                                                                                                                                                                                                                                                                                                                                                                                                                                                                                                         |                                          |                                           |
| <b>Domain item</b>                                                                                                                                                                                                                                                                                                                                                                                                                                                                                                                                                                                                                                                                                                                                                                                                                                                                                                                                                                                                                                                                                                                                                   | <b>Pre-intervention scores* (n = 55)</b> | <b>Post-intervention scores* (n = 55)</b> |
| 68. I was first diagnosed with PCOS as a result of                                                                                                                                                                                                                                                                                                                                                                                                                                                                                                                                                                                                                                                                                                                                                                                                                                                                                                                                                                                                                                                                                                                   | 2.6 ± 0.5                                | -                                         |
| 69. I had an ultrasound in the last three years                                                                                                                                                                                                                                                                                                                                                                                                                                                                                                                                                                                                                                                                                                                                                                                                                                                                                                                                                                                                                                                                                                                      | 2.4 ± 0.5                                | -                                         |
| 70. The type of ultrasound was transvaginal [In case of positive response to the last question]                                                                                                                                                                                                                                                                                                                                                                                                                                                                                                                                                                                                                                                                                                                                                                                                                                                                                                                                                                                                                                                                      | 2.2 ± 0.6                                | -                                         |
| 71. I suspect that other women in my family (like mother, sisters) or extended family (like aunts, cousins, grandmothers) have PCOS                                                                                                                                                                                                                                                                                                                                                                                                                                                                                                                                                                                                                                                                                                                                                                                                                                                                                                                                                                                                                                  | 2.5 ± 0.8                                | -                                         |
| 72. Excess weight (being overweight or obese) runs in my family                                                                                                                                                                                                                                                                                                                                                                                                                                                                                                                                                                                                                                                                                                                                                                                                                                                                                                                                                                                                                                                                                                      | 2.7 ± 0.5                                | -                                         |
| 73. I feel I need to lose weight for health reasons                                                                                                                                                                                                                                                                                                                                                                                                                                                                                                                                                                                                                                                                                                                                                                                                                                                                                                                                                                                                                                                                                                                  | 2.7 ± 0.5                                | -                                         |
| 74. I didn't know that I had hirsutism (male pattern hair growth) until I was told during the pre-study diagnosis                                                                                                                                                                                                                                                                                                                                                                                                                                                                                                                                                                                                                                                                                                                                                                                                                                                                                                                                                                                                                                                    | 2.1 ± 0.9                                | -                                         |
| <p><b>Qualitative information section</b></p> <p>Questions asked from participants after completing the lifestyle intervention study</p> <p>75. If you have been advised to lose weight, how does this make you feel?</p> <p>76. We are interested in learning more about how women experience the physical examination. Please tell us anything about your experience that you think we should know</p> <p>77. We are interested in learning more about how women experience the transvaginal ultrasound, which was part of the PCOS study. Please tell us anything about your experience that you think we should know</p> <p>78. Is there any topic that you think we should have asked you about?</p> <p>79. Is there any comment you would like to make about the topic of PCOS or the topic of being involved in a study?</p> <p>80. Is there anything that you would like to add, ask or comment about?</p> <p>81. If you learned something about PCOS during the study, what ONE thing did you learn that is most helpful to you?</p> <p>82. If you learned something about PCOS over the course of the study, what ONE thing came as a surprise to you?</p> |                                          |                                           |

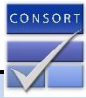

## CONSORT 2010 checklist of information to include when reporting a randomised trial\*

| Section/Topic                    | Item No | Checklist item                                                                                                                                                                              | Reported on page No     |
|----------------------------------|---------|---------------------------------------------------------------------------------------------------------------------------------------------------------------------------------------------|-------------------------|
| <b>Title and abstract</b>        |         |                                                                                                                                                                                             |                         |
|                                  | 1a      | Identification as a randomised trial in the title                                                                                                                                           | Page 1                  |
|                                  | 1b      | Structured summary of trial design, methods, results, and conclusions (for specific guidance see CONSORT for abstracts)                                                                     | Page 1                  |
| <b>Introduction</b>              |         |                                                                                                                                                                                             |                         |
| Background and objectives        | 2a      | Scientific background and explanation of rationale                                                                                                                                          | Page 2                  |
|                                  | 2b      | Specific objectives or hypotheses                                                                                                                                                           | Page 3                  |
| <b>Methods</b>                   |         |                                                                                                                                                                                             |                         |
| Trial design                     | 3a      | Description of trial design (such as parallel, factorial) including allocation ratio                                                                                                        | Page 3                  |
|                                  | 3b      | Important changes to methods after trial commencement (such as eligibility criteria), with reasons                                                                                          | Not applicable          |
| Participants                     | 4a      | Eligibility criteria for participants                                                                                                                                                       | Pages 3 and 4           |
|                                  | 4b      | Settings and locations where the data were collected                                                                                                                                        | Page 3                  |
| Interventions                    | 5       | The interventions for each group with sufficient details to allow replication, including how and when they were actually administered                                                       | Pages 3 – 6             |
| Outcomes                         | 6a      | Completely defined pre-specified primary and secondary outcome measures, including how and when they were assessed                                                                          | Page 3 – 6              |
|                                  | 6b      | Any changes to trial outcomes after the trial commenced, with reasons                                                                                                                       | Not applicable          |
| Sample size                      | 7a      | How sample size was determined                                                                                                                                                              | Page 6 and reference 18 |
|                                  | 7b      | When applicable, explanation of any interim analyses and stopping guidelines                                                                                                                | Not applicable          |
| <b>Randomisation:</b>            |         |                                                                                                                                                                                             |                         |
| Sequence generation              | 8a      | Method used to generate the random allocation sequence                                                                                                                                      | Page 4 and reference 14 |
|                                  | 8b      | Type of randomisation; details of any restriction (such as blocking and block size)                                                                                                         | Reference 14            |
| Allocation concealment mechanism | 9       | Mechanism used to implement the random allocation sequence (such as sequentially numbered containers), describing any steps taken to conceal the sequence until interventions were assigned | Reference 14            |
| Implementation                   | 10      | Who generated the random allocation sequence, who enrolled participants, and who assigned participants to interventions                                                                     | Reference 14            |
| Blinding                         | 11a     | If done, who was blinded after assignment to interventions (for example, participants, care providers, those assessing outcomes) and how                                                    | Reference 14            |
|                                  | 11b     | If relevant, description of the similarity of interventions                                                                                                                                 | Page 5, Reference 14    |
| Statistical methods              | 12a     | Statistical methods used to compare groups for primary and secondary outcomes                                                                                                               | Page 5 – 6              |
|                                  | 12b     | Methods for additional analyses, such as subgroup analyses and adjusted analyses                                                                                                            | Not applicable          |
| <b>Results</b>                   |         |                                                                                                                                                                                             |                         |

|                                                      |     |                                                                                                                                                   |                                    |
|------------------------------------------------------|-----|---------------------------------------------------------------------------------------------------------------------------------------------------|------------------------------------|
| Participant flow (a diagram is strongly recommended) | 13a | For each group, the numbers of participants who were randomly assigned, received intended treatment, and were analysed for the primary outcome    | Figure 1                           |
|                                                      | 13b | For each group, losses and exclusions after randomisation, together with reasons                                                                  | Figure 1                           |
| Recruitment                                          | 14a | Dates defining the periods of recruitment and follow-up                                                                                           | Page 3                             |
|                                                      | 14b | Why the trial ended or was stopped                                                                                                                | Figure 1                           |
| Baseline data                                        | 15  | A table showing baseline demographic and clinical characteristics for each group                                                                  | Page 16 – 17                       |
| Numbers analysed                                     | 16  | For each group, number of participants (denominator) included in each analysis and whether the analysis was by original assigned groups           | Table 1, Figure 1, and pages 6 – 8 |
| Outcomes and estimation                              | 17a | For each primary and secondary outcome, results for each group, and the estimated effect size and its precision (such as 95% confidence interval) | Pages 6 – 8, and Figures 2 – 3     |
|                                                      | 17b | For binary outcomes, presentation of both absolute and relative effect sizes is recommended                                                       | Not applicable                     |
| Ancillary analyses                                   | 18  | Results of any other analyses performed, including subgroup analyses and adjusted analyses, distinguishing pre-specified from exploratory         | Not applicable                     |
| Harms                                                | 19  | All important harms or unintended effects in each group (for specific guidance see CONSORT for harms)                                             | Not applicable                     |
| <b>Discussion</b>                                    |     |                                                                                                                                                   |                                    |
| Limitations                                          | 20  | Trial limitations, addressing sources of potential bias, imprecision, and, if relevant, multiplicity of analyses                                  | Page 10 – 11                       |
| Generalisability                                     | 21  | Generalisability (external validity, applicability) of the trial findings                                                                         | Page 10 – 11                       |
| Interpretation                                       | 22  | Interpretation consistent with results, balancing benefits and harms, and considering other relevant evidence                                     | Pages 8 – 11                       |
| <b>Other information</b>                             |     |                                                                                                                                                   |                                    |
| Registration                                         | 23  | Registration number and name of trial registry                                                                                                    | Pages 1 and 3                      |
| Protocol                                             | 24  | Where the full trial protocol can be accessed, if available                                                                                       | Reference 18                       |
| Funding                                              | 25  | Sources of funding and other support (such as supply of drugs), role of funders                                                                   | Title Page                         |

\*We strongly recommend reading this statement in conjunction with the CONSORT 2010 Explanation and Elaboration for important clarifications on all the items. If relevant, we also recommend reading CONSORT extensions for cluster randomised trials, non-inferiority and equivalence trials, non-pharmacological treatments, herbal interventions, and pragmatic trials. Additional extensions are forthcoming: for those and for up to date references relevant to this checklist, see [www.consort-statement.org](http://www.consort-statement.org).
